# Supplementary material for: Slow Interstitial Fluid Flow Activates TGF-β Signaling and Drives Fibrotic Responses in Human Tenon Fibroblasts
Source: MDPI journal article supplement (doi:10.3390/cells12172205), 2023-09-04
Supplement: s1 [file s1]

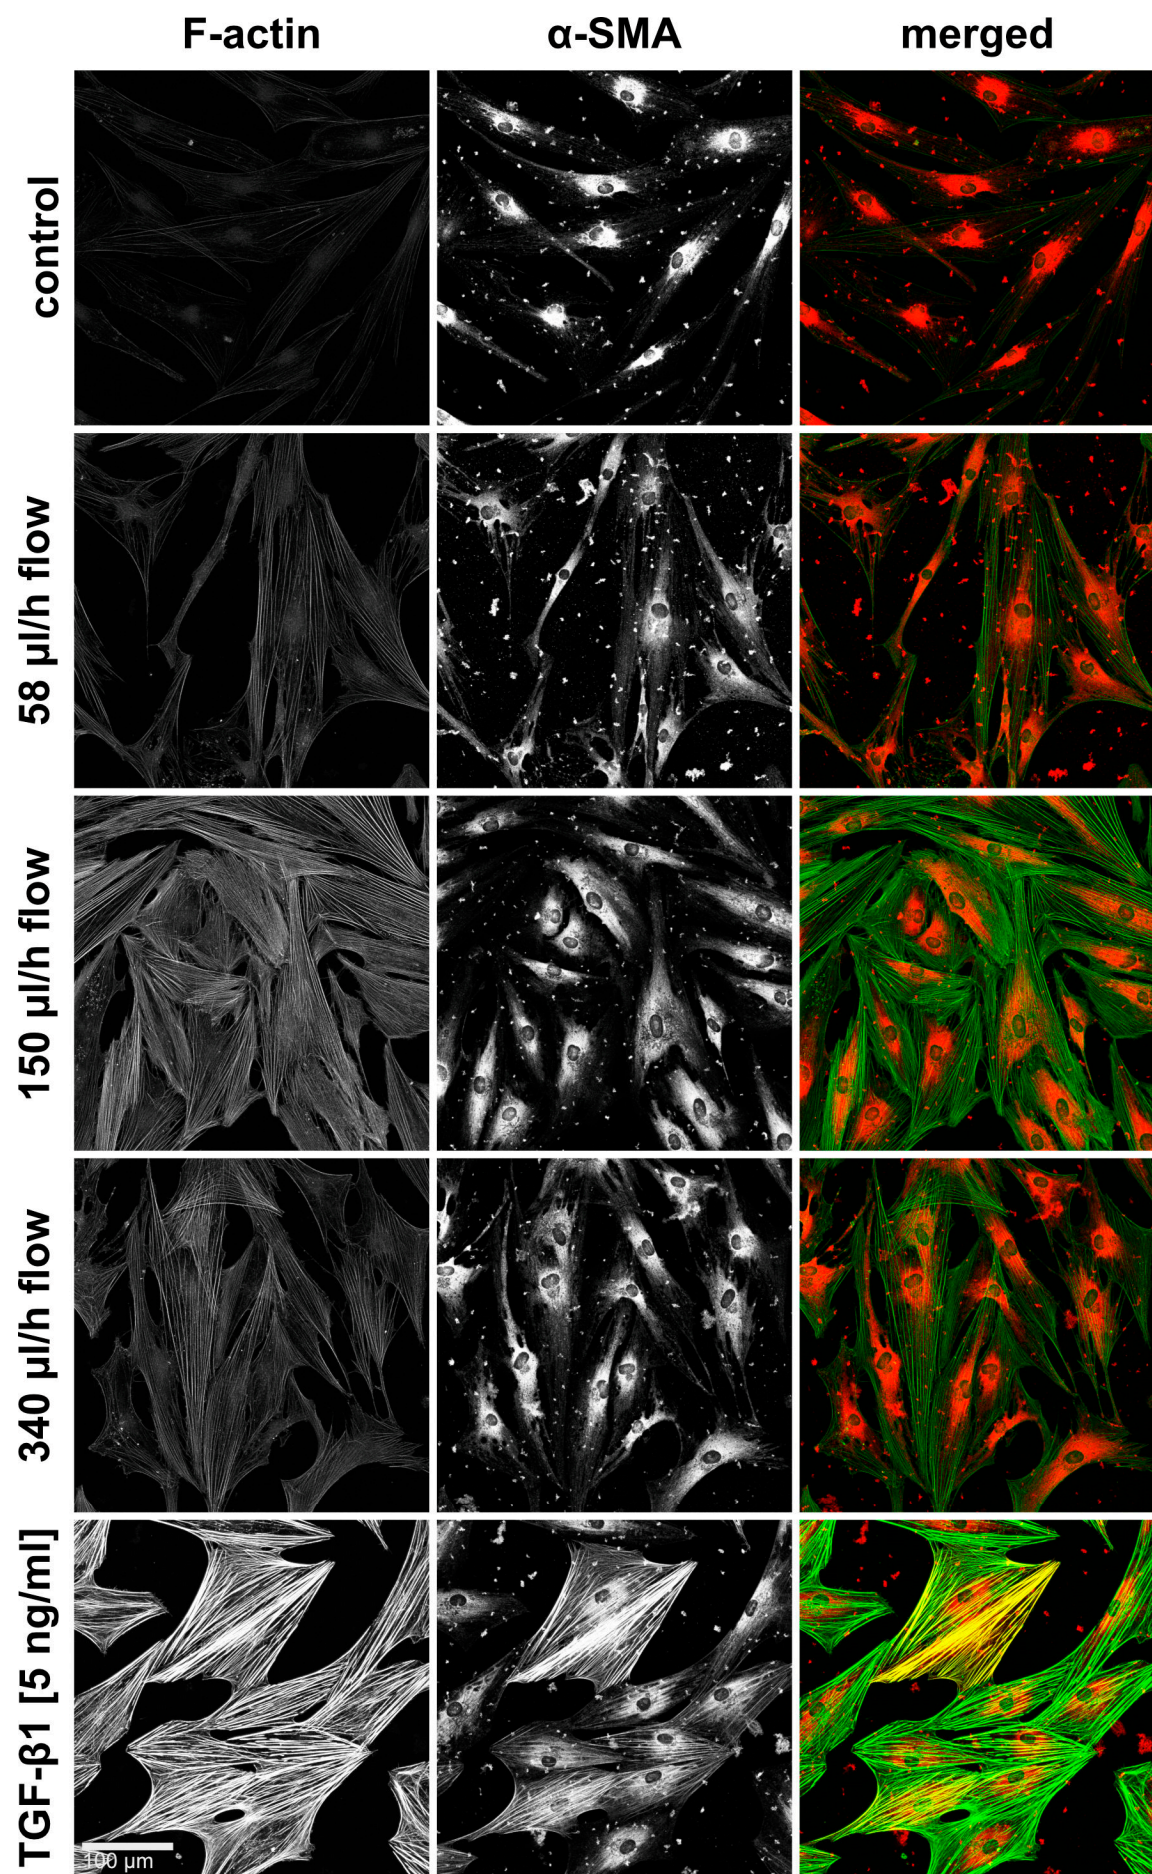

**Fig. S1:** IF of F-actin and  $\alpha$ -SMA under varying flow rates in the 2D model

Confocal immunofluorescence microscopy of F-actin and  $\alpha$ -SMA in HTFs exposed to different flow rates or TGF- $\beta$ 1 (5 ng/ml). Cells were preincubated in  $\mu$ -slides for 24 h in 0.2% FBS medium, then perfused for 72 h with the respective flow rate or stimulated with TGF- $\beta$ 1 (5 ng/ml) with 0.2% FBS medium. The result was representative of three independent experiments.

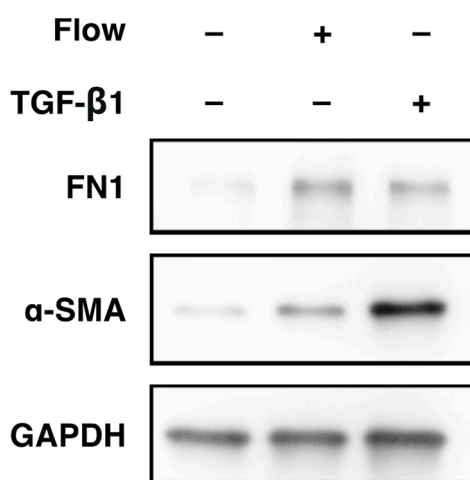

**Fig. S2:** Western blot of whole cell lysates under static conditions, flow conditions and TGF- $\beta$ 1 stimulation in the 3D model

Western blot analysis of protein levels in whole cell lysates after 72 hours is shown. In cells exposed to flow the flow rate was 666  $\mu$ l/h. The TGF- $\beta$ 1-concentration was 5 ng/ml. GAPDH served as loading control. The result was representative of three independent experiments.



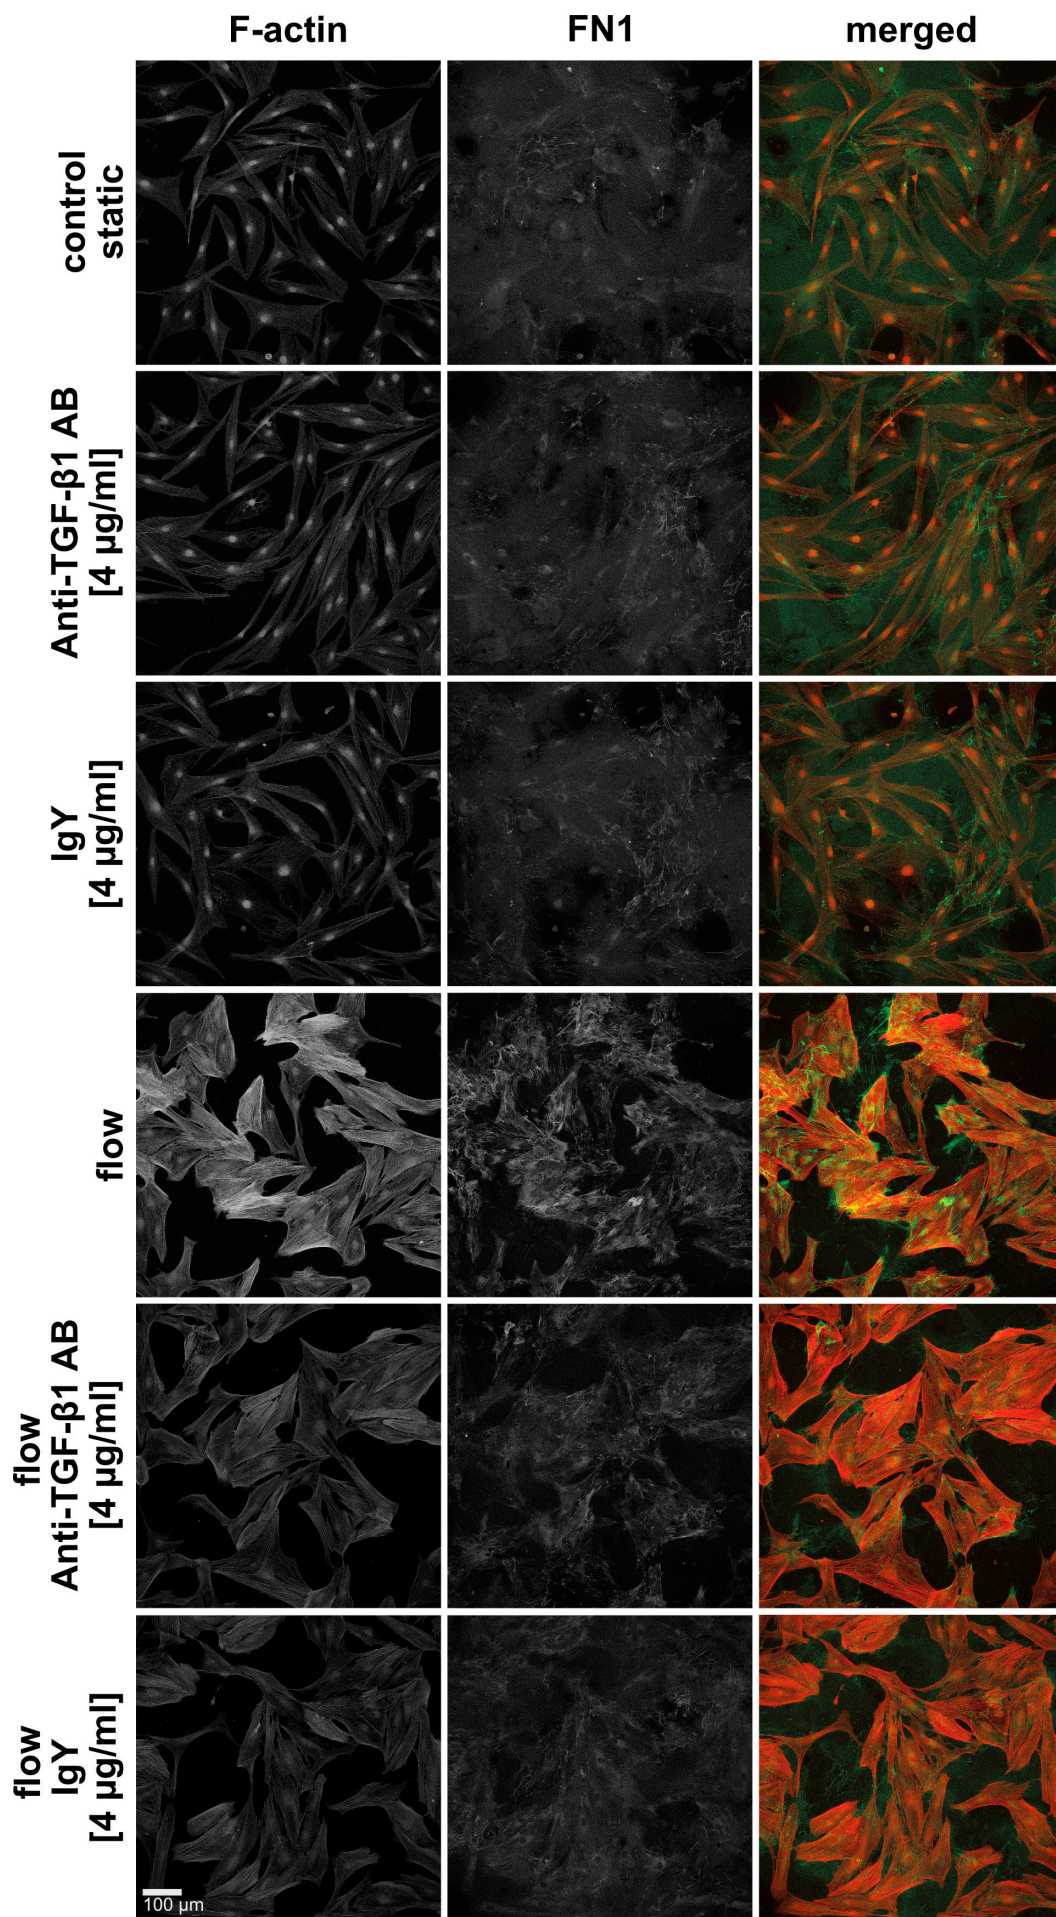

**Fig. S3:** IF of F-actin and FN1 under static conditions and flow conditions with anti-TGF- $\beta$ 1-antibodies and IgY isotype controls in the 2D model

Confocal immunofluorescence microscopy of F-actin and FN1 in HTF with anti-TGF- $\beta$ 1 antibodies [4  $\mu$ g/ml] and IgY isotype controls [4  $\mu$ g/ml] under static and flow conditions (150  $\mu$ l/h) in the 2 D model. Cells were preincubated in  $\mu$ -slides for 24 h in 0.2% FBS medium, then incubated under static or flow conditions for 72 h. Image acquisition and representation settings are identical for all conditions. The figure is representative of three independent experiments.

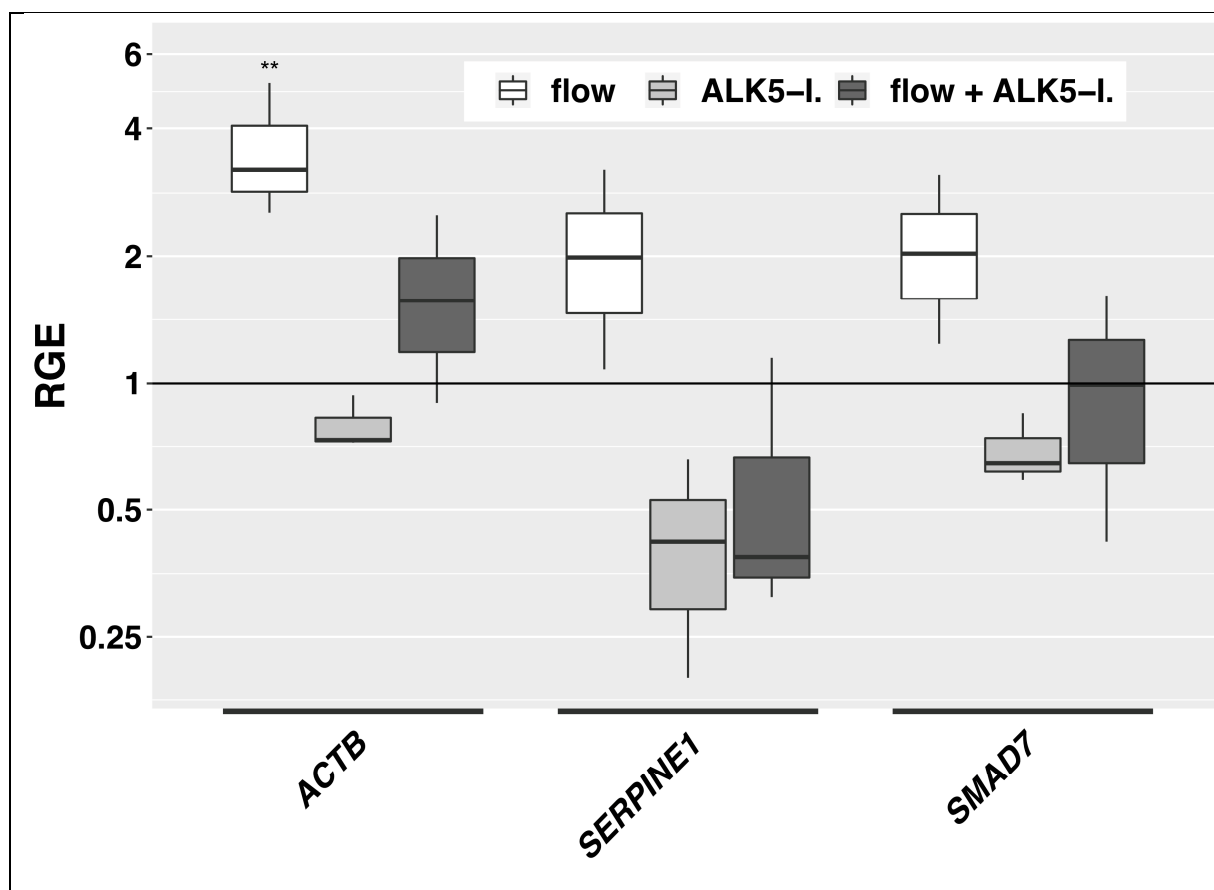

**Fig. S4:** Effects of ALK5-inhibition on the flow-induced changes in beta-actin and TGF- $\beta$ -responsive genes SERPINE1 and SMAD7

Relative gene expression of actin-beta (*ACTB*), Serpin Family E Member 1 (*SERPINE1*) and SMAD7 in the 3D model under flow (666  $\mu$ l/h), static conditions



with ALK5-I. and flow conditions with ALK5-I. (0.1  $\mu$ M, respectively) compared to static controls (72 h, n = 3). Asterisks indicate levels of significance according to Dunnett's t-test (\* $P$ <0.05, \*\* $P$  < 0.01, \*\*\* $P$ <0.001).
